# Supplementary material for: Photoluminescence and energy transfer properties of a novel molybdate KBaY(MoO4)3:Ln3+ (Ln3+ = Tb3+, Eu3+, Sm3+, Tb3+/Eu3+, Tb3+/Sm3+) as a multi-color emitting phosphor for UV w-LEDs
Source: Royal Society of Chemistry journal article supplement (doi:10.1039/c8dt01011k), 2018-01-01
Supplement: c8dt01011k1.pdf [file c8dt01011k1.pdf]

## Supporting Information

### Photoluminescence and energy transfer properties of a novel molybdate $\text{KBaY}(\text{MoO}_4)_3:\text{Ln}^{3+}$ ( $\text{Ln}^{3+} = \text{Tb}^{3+}, \text{Eu}^{3+}, \text{Sm}^{3+}, \text{Tb}^{3+}/\text{Eu}^{3+}, \text{Tb}^{3+}/\text{Sm}^{3+}$ ) as a multi-color emitting phosphor for UV w-LEDs

Kai Li\*, Rik Van Deun\*

L<sup>3</sup> – Luminescent Lanthanide Lab, Department of Chemistry, Ghent University, Krijgslaan 281-S3, B-9000 Ghent, Belgium

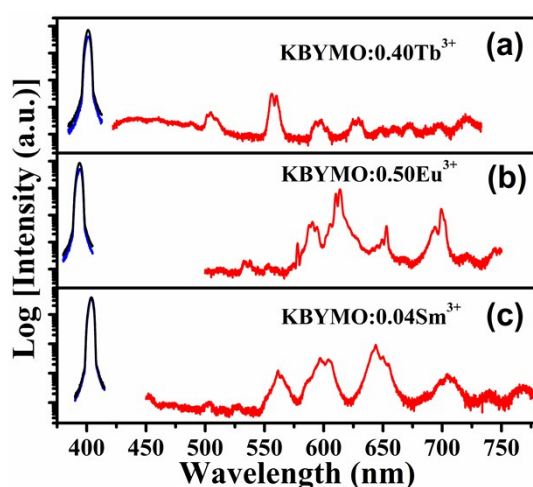

**Fig. S1** Corrected excitation and emission spectra of  $\text{KBYMO:0.40Tb}^{3+}$  (a),  $\text{KBYMO:0.50Eu}^{3+}$  (b) and  $\text{KBYMO:0.04Sm}^{3+}$  (c) in addition to their corresponding reference collected by an integrated sphere.

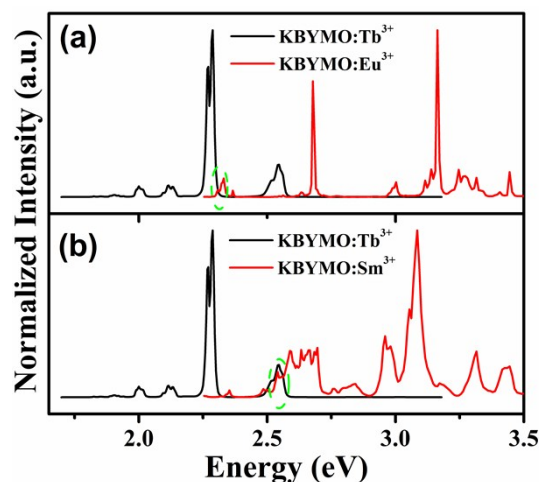

**Fig. S2** Spectral overlap between normalized  $\text{KBYMO:Tb}^{3+}$  emission and  $\text{KBYMO:Eu}^{3+}$  (a) and  $\text{KBYMO:Sm}^{3+}$  (b) excitation spectra.
